# Supplementary material for: Time-evolution of the electrical characteristics of MoS2 field-effect transistors after electron beam irradiation
Source: Royal Society of Chemistry journal article supplement (doi:10.1039/c8cp00792f), 2018-01-01
Supplement: c8cp00792f1.pdf [file c8cp00792f1.pdf]

## Supporting Information

### **Time-Evolution of the Electrical Characteristics of MoS<sub>2</sub> Field Effect Transistors After Electron Beam Irradiation**

Ming-Yen Lu<sup>1,\*</sup>, Shang-Chi Wu<sup>2</sup>, Hsiang-Chen Wang<sup>2</sup>, and Ming-Pei Lu<sup>3</sup>

<sup>1</sup> Department of Materials Science and Engineering and High Entropy Materials Center, National Tsing Hua University, Hsinchu 300, Taiwan

<sup>2</sup> Graduate Institute of Opto-Mechatronics, National Chung Cheng University, Chia-Yi 62102, Taiwan

<sup>3</sup> National Nano Device Laboratories, Hsinchu 300, Taiwan

\*Corresponding author: [mylu@mx.nthu.edu.tw](mailto:mylu@mx.nthu.edu.tw)

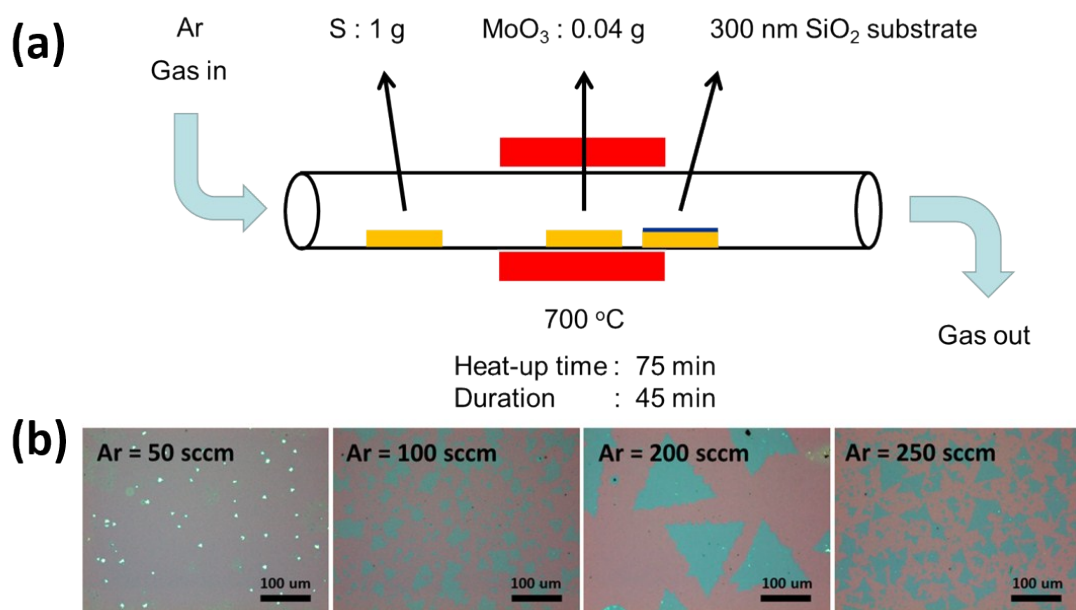

**Figure S1** (a) Schematic representation of the setup for CVD growth of MoS<sub>2</sub> flakes. (b) OM images of MoS<sub>2</sub> flakes obtained at various Ar carrier gas flow rates.

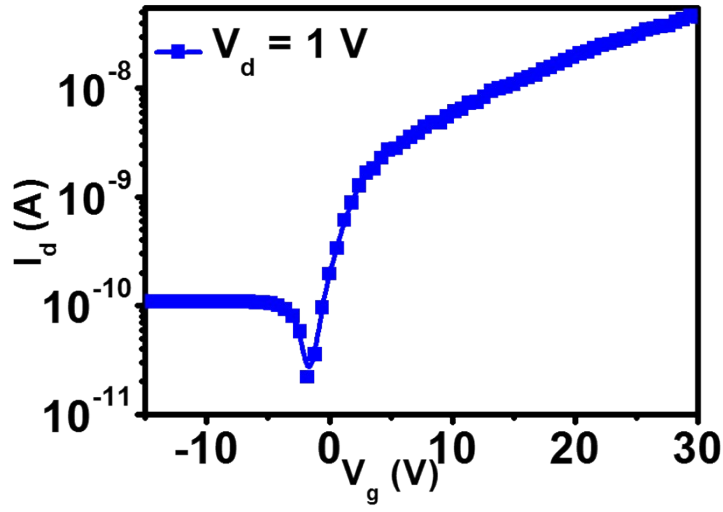

**Figure S2** Transfer characteristic of a non-irradiated MoS<sub>2</sub> FET, measured at a value of  $V_d$  of 1 V, plotted on a logarithmic scale.

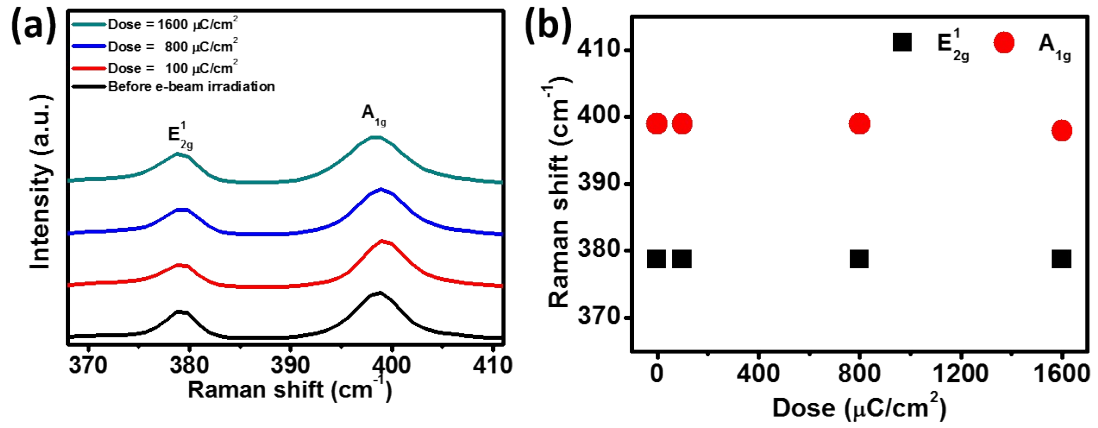

**Figure S3** (a) Raman spectra of MoS<sub>2</sub> recorded before and after e-beam irradiation at various doses. (b) Positions of the  $E_{2g}^1$  and  $A_{1g}$  vibration modes of MoS<sub>2</sub> after e-beam irradiation at various doses; the positions are almost identical, indicating that the MoS<sub>2</sub> did not undergo any significant structural change.

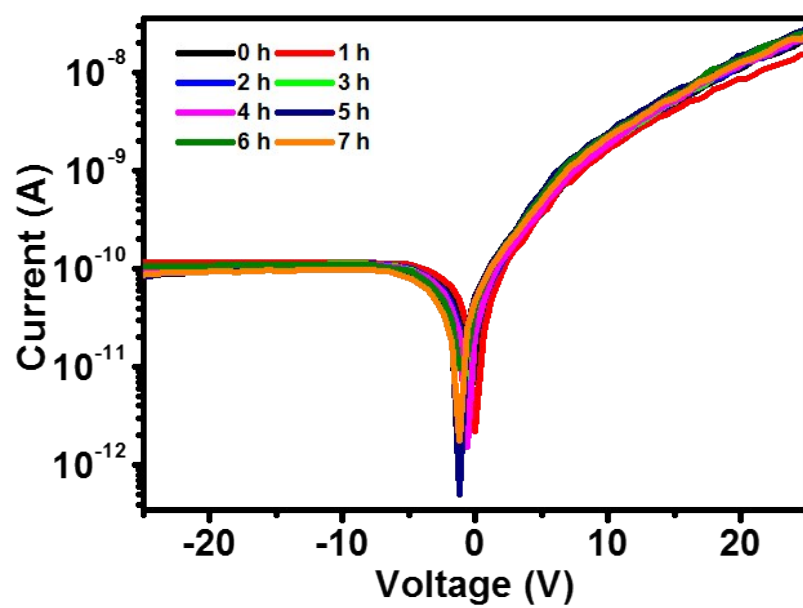

**Figure S4** Transfer characteristics of a non-irradiated MoS<sub>2</sub> FET, measured after various periods of time.
